# Supplementary material for: Studies on Novel Diagnostic and Predictive Biomarkers of Intrahepatic Cholestasis of Pregnancy Through Metabolomics and Proteomics
Source: Front Immunol. 2021 Oct 14;12:733225. doi: 10.3389/fimmu.2021.733225 (PMC8552060; doi:10.3389/fimmu.2021.733225)
Supplement: Supplementary file 1 [file DataSheet_1.xlsx]

## Sheet: DATA
	0-1	0-2	0-3	0-4	treat1-1	treat1-2	treat1-3	treat1-4	treat1-5	0-1	0-2	0-3	0-4	treat1-1	treat1-2	treat1-3	treat1-4	treat1-5
17-Hydroxyprogesterone	18919.9	18919.9	18919.9	18919.9	18919.9	18919.9	18919.9	18919.9	18919.9	5.27111e-05	8.16112e-05	2.66855e-05	1.75655e-06	9.18148e-05	1.65815e-05	1.98346e-06	1.30889e-05	1.11297e-06
1-Monolauroyl-Rac-Glycerol	93658	93658	93658	93658	93658	93658	93658	93658	93658	0.000260933	0.000403996	0.0001321	8.69538e-06	0.000454506	8.20826e-05	9.8186e-06	6.47933e-05	5.50946e-06
1-Palmitoyl-Palmitoyl	1.83551e+07	1.3329e+07	5.81319e+07	4.96488e+08	7.21888e+06	1.00715e+08	3.06062e+08	9.94585e+07	2.30884e+09	0.0511376	0.057495	0.0819922	0.0460948	0.035032	0.088267	0.0320859	0.0688062	0.135818
Deoxycytidine	43405.8	43405.8	43405.8	337106	43405.8	43405.8	123633	86993.9	401899	0.00012093	0.000187232	6.12218e-05	3.12976e-05	0.000210641	3.80412e-05	1.2961e-05	6.01831e-05	2.36418e-05
2-Hydroxyestrone	6660.48	6660.48	6660.48	374009	6660.48	6660.48	183988	8123.56	70878.3	1.85563e-05	2.87301e-05	9.39428e-06	3.47237e-05	3.23222e-05	5.8373e-06	1.92883e-05	5.61994e-06	4.16944e-06
2-Hydroxycaproic acid	20416.3	20416.3	20416.3	28116.4	20416.3	20416.3	25889.4	20416.3	20416.3	5.68803e-05	8.80661e-05	2.87962e-05	2.61038e-06	9.90768e-05	1.7893e-05	2.71411e-06	1.41242e-05	1.201e-06
2-Hydroxypalmitic Acid	889514	374344	1.2205e+06	1.45181e+07	374344	1.69672e+06	2.31509e+07	2.11996e+06	1.94369e+07	0.0024782	0.00161474	0.00172146	0.00134789	0.00181663	0.00148702	0.00242701	0.0014666	0.00114338
2-Indolecarboxylic acid	44576.9	44576.9	44576.9	44576.9	44576.9	44576.9	213324	44576.9	70066.3	0.000124192	0.000192284	6.28736e-05	4.13861e-06	0.000216324	3.90676e-05	2.23638e-05	3.08387e-05	4.12167e-06
2-Methoxyestradiol	624912	624912	624912	624912	624912	624912	624912	624912	624912	0.00174102	0.00269557	0.000881407	5.8018e-05	0.00303259	0.000547678	6.55124e-05	0.000432319	3.67606e-05
3,4,5-Trimethoxycinnamic acid	15486	15486	20771.8	15486	15486	15486	15486	15486	15486	4.31443e-05	6.67992e-05	2.92976e-05	1.43775e-06	7.51509e-05	1.35721e-05	1.62347e-06	1.07133e-05	9.1097e-07
3-Hydroxyphenylacetic acid	34015.3	34015.3	34015.3	34015.3	34015.3	34015.3	34015.3	34015.3	39199.9	9.47674e-05	0.000146726	4.79769e-05	3.15805e-06	0.000165071	2.98113e-05	3.56599e-06	2.35321e-05	2.30595e-06
3-Indoleacetonitrile	13778.1	13778.1	13778.1	13778.1	13778.1	13778.1	13778.1	13778.1	13778.1	3.83861e-05	5.94322e-05	1.94334e-05	1.27919e-06	6.68628e-05	1.20753e-05	1.44442e-06	9.53181e-06	8.10503e-07
3-Indolepropionic acid	556303	556303	556303	556303	556303	556303	556303	556303	1.26739e+06	0.00154987	0.00239962	0.000784638	5.16482e-05	0.00269964	0.000487549	5.83198e-05	0.000384855	7.45545e-05
3-Methyladenine	222537	222537	222537	3.13155e+06	222537	415067	3.97286e+06	560081	5.06326e+06	0.000619992	0.000959916	0.000313877	0.000290739	0.00107993	0.000363768	0.000416493	0.000387469	0.000297848
3-Methylhistidine	52816.9	52816.9	68505.5	619930	52816.9	345709	324224	180896	482439	0.000147149	0.000227827	9.66236e-05	5.75555e-05	0.000256311	0.000302982	3.39899e-05	0.000125146	2.83796e-05
3-Methylxanthine	186667	186667	186667	186667	186667	186667	356177	186667	244695	0.000520058	0.000805191	0.000263284	1.73305e-05	0.000905862	0.000163596	3.73397e-05	0.000129138	1.43942e-05
3-Pyridylacetic acid	380551	380551	380551	1.23791e+06	380551	380551	1.40682e+06	658760	380551	0.00106022	0.00164151	0.000536748	0.00011493	0.00184675	0.000333518	0.000147483	0.000455735	2.2386e-05
Ureidopropionic acid	426636	520320	817966	866832	675133	2.66564e+06	1.90394e+06	3.35442e+06	2.10325e+06	0.00118862	0.00224441	0.0011537	8.04783e-05	0.0032763	0.00233619	0.000199599	0.00232062	0.000123725
Xanthurenic acid	9264.78	8895.87	8895.87	130980	8895.87	8895.87	59336.9	8895.87	132670	2.58119e-05	3.83725e-05	1.25472e-05	1.21604e-05	4.31701e-05	7.79642e-06	6.22056e-06	6.15423e-06	7.80437e-06
4-Aminohippuric acid	7380.7	7380.7	7380.7	7380.7	7380.7	7380.7	7380.7	9545.65	125885	2.05628e-05	3.18368e-05	1.04101e-05	6.85238e-07	3.58173e-05	6.46851e-06	7.73754e-07	6.60375e-06	7.40524e-06
4-Hydroxycinnamic acid	550666	550666	550666	550666	550666	550666	550666	550666	1.53486e+06	0.00153417	0.00237531	0.000776687	5.11249e-05	0.00267229	0.000482608	5.77289e-05	0.000380955	9.02885e-05
4-Methylcatechol	9214.92	20666	9214.92	9214.92	9214.92	9214.92	9214.92	9214.92	9214.92	2.5673e-05	8.91432e-05	1.29972e-05	8.5553e-07	4.47184e-05	8.07603e-06	9.66043e-07	6.37495e-06	5.42071e-07
5'-Methylthioadenosine	122042	122042	122042	162627	122042	122042	122042	122042	357292	0.000340011	0.000526429	0.000172134	1.50986e-05	0.000592247	0.000106958	1.27942e-05	8.44294e-05	2.10178e-05
5-Methoxy-Dl-Tryptophan	7508.02	7508.02	7508.02	458069	7508.02	7508.02	398167	7508.02	539837	2.09175e-05	3.2386e-05	1.05897e-05	4.2528e-05	3.64351e-05	6.58009e-06	4.17417e-05	5.19411e-06	3.17561e-05
5-Methoxytryptamine	16473.8	16473.8	16473.8	20432	16473.8	16473.8	16473.8	16473.8	56525.4	4.58963e-05	7.10599e-05	2.32354e-05	1.89694e-06	7.99444e-05	1.44377e-05	1.72702e-06	1.13967e-05	3.32513e-06
5-Methoxytryptophol	366369	366369	366369	366369	366369	366369	366369	366369	366369	0.00102071	0.00158034	0.000516745	3.40144e-05	0.00177793	0.000321089	3.84082e-05	0.000253457	2.15518e-05
7b-Hydroxycholesterol	61939.4	208193	94664.1	297992	204311	466670	440151	108424	1.78805e+06	0.000172564	0.000898043	0.000133519	2.76662e-05	0.000991487	0.000408994	4.61431e-05	7.50083e-05	0.000105183
Acetylglycine	34430.5	34430.5	34430.5	34430.5	34430.5	34430.5	34430.5	34430.5	34430.5	9.59241e-05	0.000148517	4.85625e-05	3.19659e-06	0.000167085	3.01752e-05	3.60951e-06	2.38193e-05	2.02539e-06
L-Acetylcarnitine	3.53303e+07	5.05394e+06	8.02465e+07	2.74208e+09	6.64116e+06	2.14632e+08	2.11167e+09	2.72307e+08	3.5813e+09	0.098431	0.0218003	0.113184	0.25458	0.0322284	0.188105	0.221376	0.188384	0.210671
Adenine	948465	948465	1.24902e+06	1.22591e+07	948465	1.77702e+06	1.34675e+07	948465	3.26866e+07	0.00264244	0.00409122	0.00176169	0.00113816	0.00460274	0.0015574	0.00141186	0.000656156	0.0019228
Adenosine	1.88873e+06	595085	7.75634e+06	2.7882e+08	463268	6.44791e+06	3.21969e+08	7.67152e+06	2.40861e+08	0.00526204	0.00256691	0.0109399	0.0258862	0.00224816	0.005651	0.0337535	0.00530722	0.0141687
3'-AMP	7.59826e+06	1.26171e+06	1.87523e+07	1.72406e+09	1.15333e+06	2.51311e+07	1.12336e+09	5.01416e+07	7.82056e+08	0.0211689	0.00544241	0.0264492	0.160065	0.00559693	0.0220251	0.117767	0.0346884	0.0460047
Agmatine Sulfate	7338.86	7338.86	7338.86	7338.86	7338.86	7338.86	7338.86	7338.86	12367.2	2.04462e-05	3.16563e-05	1.03511e-05	6.81353e-07	3.56142e-05	6.43184e-06	7.69367e-07	5.07708e-06	7.27504e-07
Arachidonic acid	2.39331e+06	1.58041e+06	2.07087e+06	761290	1.06741e+06	9.87611e+06	2.22448e+07	212119	9.15929e+07	0.0066678	0.00681712	0.00292086	7.06796e-05	0.00517995	0.00865551	0.00233203	0.000146746	0.00538798
Argininosuccinic acid	25997.3	6965.23	19647.3	678721	7358.56	20716.2	293038	18897.9	521566	7.24289e-05	3.00447e-05	2.77116e-05	6.30137e-05	3.57098e-05	1.81559e-05	3.07206e-05	1.30737e-05	3.06813e-05
Ascorbic acid	63988.8	13928.9	18492.5	21590.2	13928.9	13928.9	45193.7	13928.9	13928.9	0.000178274	6.00828e-05	2.60828e-05	2.00448e-06	6.75948e-05	1.22074e-05	4.73787e-06	9.63615e-06	8.19375e-07
Benzenebutanoic acid	3.94319e+06	3.94319e+06	3.94319e+06	4.10586e+06	3.94319e+06	3.94319e+06	3.94319e+06	3.94319e+06	8.45893e+06	0.0109858	0.017009	0.00556167	0.000381195	0.0191356	0.00345585	0.000413383	0.00272793	0.0004976
Benzocaine	2.01604e+06	2.01604e+06	2.01604e+06	2.08543e+06	2.01604e+06	2.01604e+06	2.01604e+06	2.01604e+06	2.01604e+06	0.00561673	0.00869624	0.00284353	0.000193616	0.0097835	0.00176688	0.000211351	0.00139471	0.000118594
Beta-Alanine	13791.5	13791.5	13791.5	18601.7	13791.5	13791.5	13791.5	13791.5	18675.1	3.84235e-05	5.94901e-05	1.94523e-05	1.72702e-06	6.6928e-05	1.2087e-05	1.44583e-06	9.5411e-06	1.09857e-06
Bilirubin	88769.2	146837	40435.3	838566	28732.1	164729	28732.1	141255	9.0844e+06	0.000247313	0.000633385	5.7032e-05	7.78541e-05	0.000139432	0.00014437	3.01212e-06	9.77213e-05	0.000534393
Biotin	35715.8	9536.34	9536.34	193589	9536.34	9536.34	129229	9536.34	293417	9.95049e-05	4.11352e-05	1.34505e-05	1.79732e-05	4.62782e-05	8.35773e-06	1.35476e-05	6.59731e-06	1.72604e-05
Capric acid	7139.4	7139.4	7139.4	7139.4	7139.4	7139.4	7139.4	8207.93	7361.61	1.98905e-05	3.07959e-05	1.00698e-05	6.62835e-07	3.46463e-05	6.25703e-06	7.48456e-07	5.67831e-06	4.33049e-07
Carnosine	8106.61	8106.61	8106.61	21345.6	8106.61	11969.4	125795	42325.2	500954	2.25852e-05	3.4968e-05	1.1434e-05	1.98176e-06	3.934e-05	1.04901e-05	1.31877e-05	2.92809e-05	2.94688e-05
Cholesterol	4.86181e+07	3.53707e+07	9.66624e+07	2.53536e+08	2.0508e+07	9.80721e+07	1.91867e+08	1.25665e+08	9.93016e+08	0.135451	0.152572	0.136337	0.0235388	0.0995218	0.0859512	0.0201143	0.0869364	0.0584145
Cholic acid	6830.19	6830.19	6830.19	246904	6830.19	180547	363717	6830.19	4.24333e+06	1.90291e-05	2.94622e-05	9.63364e-06	2.2923e-05	3.31457e-05	0.000158233	3.81301e-05	4.72518e-06	0.000249615
Docosahexaenoic acid	751410	780967	181153	4.17355e+06	416350	4.34631e+06	181153	573512	2.59944e+07	0.00209344	0.00336872	0.000255507	0.00038748	0.00202047	0.00380914	1.89911e-05	0.00039676	0.00152913
cis-Aconitic acid	23326.9	23326.9	23326.9	175625	23326.9	23326.9	194386	23326.9	23326.9	6.49892e-05	0.000100621	3.29014e-05	1.63054e-05	0.000113201	2.04439e-05	2.03784e-05	1.61377e-05	1.37221e-06
Cortisol	15192.8	15192.8	15192.8	1.42504e+06	15192.8	21999.1	607146	52841.3	451562	4.23273e-05	6.55343e-05	2.14286e-05	0.000132303	7.37278e-05	1.92802e-05	6.365e-05	3.6556e-05	2.65633e-05
Cortisone	218583	28967.9	542867	2.10658e+07	23698.2	661900	2.0226e+07	1.09657e+06	2.8976e+06	0.000608978	0.000124953	0.000765687	0.00195579	0.000115003	0.000580094	0.00212039	0.000758613	0.000170452
Creatinine	416061	416061	416061	8.65758e+06	416061	1.24469e+06	6.51645e+06	1.3686e+06	1.35847e+07	0.00115916	0.00179469	0.000586834	0.000803786	0.00201907	0.00109085	0.000683149	0.000946809	0.000799126
Cyclic AMP	58926.6	58926.6	58926.6	58926.6	75435.4	58926.6	58926.6	58926.6	58926.6	0.000164171	0.000254181	8.3113e-05	5.47085e-06	0.000366075	5.16437e-05	6.17755e-06	4.07659e-05	3.46637e-06
Cytidine	101078	60139.8	2.30612e+06	1.37427e+07	192570	402006	2.95032e+07	1.56966e+06	1.05507e+07	0.000281604	0.000259414	0.00325267	0.0012759	0.000934507	0.000352321	0.00309296	0.00108591	0.000620647
Cytidine monophosphate	9037	9037	43050.9	7.35985e+07	9037	9037	6.03941e+07	66563.7	1.95928e+07	2.51773e-05	3.89813e-05	6.07211e-05	0.00683303	4.3855e-05	7.9201e-06	0.0063314	4.60493e-05	0.00115255
Cytosine	30753.6	30753.6	30753.6	34824.5	30753.6	30753.6	30753.6	30753.6	46178.7	8.56802e-05	0.000132656	4.33764e-05	3.23318e-06	0.000149242	2.69527e-05	3.22404e-06	2.12756e-05	2.71648e-06
5-Aminolevulinic acid	14165.3	14165.3	14165.3	27004.2	14165.3	14165.3	107422	14165.3	108587	3.94647e-05	6.11021e-05	1.99794e-05	2.50712e-06	6.87416e-05	1.24146e-05	1.12616e-05	9.79964e-06	6.38769e-06
5-Hydroxylysine	51739.9	30115.8	139312	244511	41561.1	233215	370687	304658	496578	0.000144148	0.000129905	0.000196492	2.27009e-05	0.000201689	0.000204391	3.88609e-05	0.000210765	2.92114e-05
Deoxycholic acid	120688	68440.6	68440.6	68440.6	72983.7	68440.6	68440.6	68440.6	68440.6	0.000336239	0.00029522	9.6532e-05	6.35415e-06	0.000354177	5.99819e-05	7.17495e-06	4.73477e-05	4.02604e-06
Deoxyinosine	16865	16865	81979.7	1.4624e+06	16865	109731	1.33924e+06	226163	2.80428e+06	4.69863e-05	7.27476e-05	0.000115628	0.000135772	8.1843e-05	9.61691e-05	0.000140399	0.000156461	0.000164963
Glucosamine 6-phosphate	6715.7	6715.7	195939	6.36764e+06	6715.7	349787	8.87417e+06	1.00703e+06	2.34425e+07	1.87101e-05	2.89683e-05	0.000276362	0.000591183	3.25901e-05	0.000306556	0.000930321	0.000696669	0.00137902
D-Glucuronic acid	135828	23653.9	47258.5	429460	23653.9	25048.3	431011	23653.9	280408	0.000378421	0.000102032	6.66558e-05	3.98719e-05	0.000114788	2.19526e-05	4.51849e-05	1.63639e-05	1.64951e-05
D-Glucurono-6,3-lactone	22351.5	22351.5	22351.5	22351.5	22351.5	22351.5	22351.5	22351.5	22351.5	6.22717e-05	9.64136e-05	3.15257e-05	2.07515e-06	0.000108468	1.9589e-05	2.34321e-06	1.54629e-05	1.31483e-06
D-Glutamic acid	1.09714e+07	7.89105e+06	2.72248e+07	7.51803e+07	1.01082e+07	6.09596e+07	9.73414e+07	7.49506e+07	9.74637e+07	0.0305666	0.0340382	0.0383992	0.00697988	0.0490531	0.0534255	0.0102048	0.0518514	0.00573334
D-Glyceraldehyde 3-phosphate	181146	43742.1	101417	132613	43742.1	97997.7	297887	336669	43742.1	0.000504675	0.000188683	0.000143044	1.2312e-05	0.000212273	8.5886e-05	3.12289e-05	0.00023291	2.57315e-06
Dihydrotestosterone	173233	173233	173233	173233	173233	173233	173233	173233	173233	0.000482632	0.000747246	0.000244337	1.60833e-05	0.000840671	0.000151823	1.81609e-05	0.000119844	1.01905e-05
Dihydroxyacetone phosphate	279069	48225.8	305588	20151.4	20151.4	440435	20151.4	614674	20151.4	0.000777492	0.000208023	0.000431016	1.87089e-06	9.77913e-05	0.000386001	2.11257e-06	0.000425236	1.18541e-06
Glyceraldehyde	2.67787e+06	1.6884e+06	8.91542e+06	1.04876e+08	2.12344e+06	1.8227e+07	1.31961e+08	2.18501e+07	2.18784e+08	0.00746061	0.00728297	0.0125748	0.00973692	0.0103047	0.0159743	0.0138341	0.0151161	0.01287
Isocitric acid	10323.6	10323.6	10323.6	10323.6	10323.6	12316.3	10323.6	10323.6	10323.6	2.87618e-05	4.45311e-05	1.45609e-05	9.58464e-07	5.00987e-05	1.07941e-05	1.08227e-06	7.14196e-06	6.0729e-07
Mannose 6-phosphate	28866.1	42328.7	148760	1.26645e+06	19972.6	306631	2.13466e+06	190421	980497	8.04217e-05	0.000182586	0.000209818	0.00011758	9.69236e-05	0.000268734	0.000223787	0.000131735	5.76781e-05
Dodecanedioic acid	470345	306338	451301	5.57207e+06	381030	552180	5.21162e+06	607603	7.84293e+06	0.00131039	0.0013214	0.000636537	0.000517322	0.00184907	0.000483935	0.000546359	0.000420344	0.000461363
Neopterin	5283.52	5283.52	5283.52	18995.8	5283.52	5283.52	21491.2	6757.52	21559.9	1.472e-05	2.27906e-05	7.45214e-06	1.76361e-06	2.564e-05	4.63052e-06	2.25303e-06	4.67491e-06	1.26827e-06
D-Glucaric acid	932771	932771	932771	932771	932771	932771	1.49929e+06	932771	2.52522e+06	0.00259872	0.00402353	0.00131563	8.66002e-05	0.00452658	0.000817488	0.000157177	0.000645298	0.000148547
Sphingosine	6.70465e+06	3.39915e+06	1.26312e+07	1.85626e+08	1.33549e+06	1.43341e+07	2.73823e+08	2.68577e+07	4.69251e+08	0.0186793	0.0146623	0.0178156	0.0172338	0.00648091	0.0125625	0.0287062	0.0185804	0.0276039
Estradiol	102833	102833	102833	102833	102833	102833	241935	102833	287202	0.000286494	0.000443571	0.00014504	9.54718e-06	0.000499029	9.01234e-05	2.53632e-05	7.11404e-05	1.68948e-05
Estriol	93131.6	93131.6	93131.6	188331	93131.6	93131.6	93131.6	93131.6	93131.6	0.000259467	0.000401725	0.000131357	1.7485e-05	0.000451951	8.16213e-05	9.76342e-06	6.44292e-05	5.4785e-06
Estrone	56007.2	56007.2	56007.2	625895	56007.2	56007.2	1.10253e+06	56007.2	860274	0.000156037	0.000241588	7.89953e-05	5.81092e-05	0.000271793	4.90851e-05	0.000115583	3.87462e-05	5.06059e-05
Ethylmalonic acid	23703.3	23703.3	27732.7	23703.3	23703.3	23703.3	23703.3	23703.3	23703.3	6.60379e-05	0.000102245	3.91155e-05	2.20066e-06	0.000115028	2.07738e-05	2.48493e-06	1.63981e-05	1.39435e-06
Folic acid	32689	32689	32689	36849.8	32689	32689	35013.9	32689	32689	9.10723e-05	0.000141005	4.61063e-05	3.42121e-06	0.000158634	2.86489e-05	3.67067e-06	2.26145e-05	1.92294e-06
Fumaric acid	37570.6	37570.6	37570.6	97952.3	37570.6	37570.6	169992	37570.6	37570.6	0.000104672	0.000162061	5.29914e-05	9.09407e-06	0.000182323	3.29271e-05	1.7821e-05	2.59916e-05	2.2101e-06
Gallic acid	106518	106518	106518	106518	106518	106518	106518	106518	106518	0.000296762	0.000459468	0.000150238	9.88934e-06	0.000516914	9.33533e-05	1.11668e-05	7.36901e-05	6.26596e-06
Gamma-Linolenic acid	2.33713e+06	2.33713e+06	2.33713e+06	2.33713e+06	2.33713e+06	2.33713e+06	2.33713e+06	2.33713e+06	2.33713e+06	0.00651128	0.0100812	0.0032964	0.000216983	0.0113417	0.00204828	0.000245012	0.00161684	0.000137482
Gentisic acid	9112.59	9112.59	9112.59	9112.59	9112.59	9112.59	9112.59	9112.59	15040.1	2.53879e-05	3.93073e-05	1.28529e-05	8.4603e-07	4.42218e-05	7.98635e-06	9.55315e-07	6.30416e-06	8.8474e-07
Gluconolactone	190688	127286	1.06204e+06	1.48528e+07	94087.2	1.16071e+06	1.54563e+07	1.5837e+06	3.26258e+07	0.000531261	0.00054905	0.00149796	0.00137896	0.000456589	0.00101725	0.00162035	0.00109562	0.00191922
Glucose 6-phosphate	1.1755e+07	3.67681e+06	2.29485e+07	8.49089e+06	2.63701e+06	3.99602e+07	1.20326e+07	3.87161e+07	4.52267e+07	0.0327497	0.01586	0.0323677	0.00078831	0.0127969	0.0350215	0.00126144	0.0267841	0.00266048
Glycerophosphocholine	4.62207e+06	3.2955e+06	1.48239e+07	1.42798e+07	1.7195e+06	3.56208e+07	6.58034e+07	2.03628e+07	2.90691e+07	0.0128772	0.0142152	0.0209084	0.00132576	0.00834443	0.0312184	0.00689848	0.0140872	0.00171
Glycine	42757.2	40263.6	40263.6	1.07564e+06	40263.6	185304	753525	217733	1.0764e+06	0.000119122	0.000173678	5.67897e-05	9.98644e-05	0.000195392	0.000162402	7.89955e-05	0.00015063	6.33195e-05
Glycocholic acid	24173.8	24173.8	34111.7	1.89005e+06	24173.8	1.05382e+07	8.76185e+06	1.44683e+06	3.52697e+08	6.73487e-05	0.000104274	4.81128e-05	0.000175476	0.000117311	0.00923576	0.000918546	0.00100093	0.0207475
Guanidine	354595	85318.8	85318.8	85318.8	85318.8	85318.8	85318.8	85318.8	85318.8	0.000987909	0.000368024	0.000120338	7.92116e-06	0.000414037	7.47741e-05	8.94437e-06	5.90242e-05	5.01891e-06
Guanine	713297	713297	713297	2.78954e+07	713297	2.13561e+06	4.28024e+07	4.43612e+06	4.65404e+07	0.00198726	0.00307682	0.00100607	0.00258986	0.0034615	0.00187167	0.00448718	0.00306894	0.00273776
Hexadecanedioic acid	2.11974e+06	2.11974e+06	2.11974e+06	2.15922e+06	2.11974e+06	2.11974e+06	2.11974e+06	2.11974e+06	3.57705e+06	0.00590564	0.00914353	0.00298979	0.000200466	0.0102867	0.00185776	0.000222222	0.00146645	0.000210421
Hippuric acid	175324	175324	175324	893399	175324	175324	691176	175324	493039	0.000488455	0.000756262	0.000247285	8.29449e-05	0.000850815	0.000153655	7.24593e-05	0.00012129	2.90032e-05
Histamine	9197.24	9197.24	17505.3	9197.24	9197.24	9197.24	9197.24	11765	9197.24	2.56237e-05	3.96725e-05	2.46904e-05	8.53889e-07	4.46326e-05	8.06054e-06	9.6419e-07	8.13909e-06	5.41031e-07
Homocysteine	14910.3	14910.3	14910.3	93440.6	14910.3	19485.9	595008	45251.8	625249	4.15404e-05	6.43159e-05	2.10302e-05	8.6752e-06	7.23571e-05	1.70776e-05	6.23774e-05	3.13056e-05	3.67805e-05
4-Hydroxyproline	140668	140668	488196	140668	152036	713801	140668	1.11933e+06	140668	0.000391905	0.000606776	0.000688576	1.30599e-05	0.000737805	0.000625581	1.47469e-05	0.000774362	8.27487e-06
Hypotaurine	780401	780401	780401	5.96158e+06	780401	962634	1.0907e+07	1.46529e+06	1.01059e+07	0.00217421	0.00336628	0.00110072	0.000553484	0.00378715	0.00084366	0.00114343	0.0010137	0.000594486
1H-Indole-3-acetamide	7474.21	7474.21	7474.21	7474.21	7474.21	7731.95	7474.21	7474.21	7474.21	2.08233e-05	3.22401e-05	1.0542e-05	6.93919e-07	3.6271e-05	6.77635e-06	7.83556e-07	5.17072e-06	4.39673e-07
Indoleacetic acid	884578	884578	884578	884578	884578	884578	1.33e+06	884578	884578	0.00246445	0.00381565	0.00124765	8.21259e-05	0.0042927	0.000775252	0.00013943	0.000611958	5.20356e-05
Inosine	2.31932e+06	732296	6.61176e+06	2.27749e+08	538775	1.57264e+07	3.03263e+08	1.31078e+07	3.22466e+08	0.00646168	0.00315878	0.00932555	0.0211447	0.00261458	0.0137827	0.0317924	0.00906809	0.0189692
Iodotyrosine	8825.81	8825.81	8825.81	238826	8825.81	10181.8	799649	61673.9	216967	2.45889e-05	3.80703e-05	1.24484e-05	2.2173e-05	4.28301e-05	8.92344e-06	8.3831e-05	4.26665e-05	1.27632e-05
L-Aspartyl-L-phenylalanine	7178.56	7178.56	61675	5.15528e+06	7178.56	66118.1	3.83741e+06	206052	9.45539e+06	1.99996e-05	3.09649e-05	8.69896e-05	0.000478626	3.48363e-05	5.79464e-05	0.000402294	0.000142549	0.000556216
L-Carnitine	1.12603e+07	5.31522e+06	3.40005e+07	2.35341e+08	4.43141e+06	3.78149e+07	2.24525e+08	5.12357e+07	4.20615e+08	0.0313715	0.0229273	0.0479561	0.0218495	0.0215048	0.0331413	0.023538	0.0354453	0.0247428
L-Cysteine	20014.3	20014.3	20014.3	21789.9	20014.3	20014.3	61518.7	26428.9	20014.3	5.57604e-05	8.63323e-05	2.82292e-05	2.02302e-06	9.71262e-05	1.75407e-05	6.44929e-06	1.82837e-05	1.17735e-06
L-Cystine	202633	76056.9	330218	1.09977e+06	47705.5	555240	1.38573e+06	580730	1.6675e+06	0.000564539	0.000328073	0.000465757	0.000102105	0.000231507	0.000486617	0.000145273	0.000401754	9.80914e-05
L-Dihydroorotic acid	10861.7	10861.7	10861.7	10861.7	10861.7	10861.7	10861.7	10861.7	10861.7	3.02608e-05	4.6852e-05	1.53198e-05	1.00842e-06	5.27098e-05	9.51926e-06	1.13868e-06	7.51419e-06	6.38941e-07
L-Dopa	18940.5	8641.12	13252.6	674391	8641.12	111746	1.48927e+06	86708.3	1.21792e+06	5.27686e-05	3.72736e-05	1.86922e-05	6.26118e-05	4.19339e-05	9.7935e-05	0.000156127	5.99855e-05	7.16444e-05
Levulinic acid	10537.2	10537.2	10537.2	81968.9	10537.2	10537.2	56531.4	10537.2	36151.9	2.93569e-05	4.54525e-05	1.48622e-05	7.61015e-06	5.11353e-05	9.2349e-06	5.92646e-06	7.28973e-06	2.12665e-06
L-Histidine	157867	27298.5	344569	2.68103e+06	27298.5	812219	1.35642e+06	1.08141e+06	6.44191e+06	0.00043982	0.000117753	0.000485997	0.000248911	0.000132475	0.000711835	0.0001422	0.000748126	0.000378948
Linoleic acid	1.01102e+06	1.01102e+06	1.01102e+06	1.01102e+06	1.01102e+06	1.01102e+06	1.13603e+06	1.01102e+06	3.22014e+06	0.00281671	0.00436104	0.00142599	9.38646e-05	0.00490629	0.000886063	0.000119095	0.000699429	0.000189426
Lithocholic acid	15933.6	15933.6	15933.6	22080.7	15933.6	15933.6	34026.3	15933.6	62110.8	4.43913e-05	6.87299e-05	2.24735e-05	2.05001e-06	7.7323e-05	1.39643e-05	3.56714e-06	1.1023e-05	3.65369e-06
L-Leucine	1.62491e+07	3.1562e+06	4.15233e+07	1.7242e+09	3.89102e+06	7.43158e+07	1.45018e+09	1.50182e+08	2.51967e+09	0.0452704	0.0136143	0.0585666	0.160078	0.0188824	0.065131	0.152029	0.103897	0.14822
L-Lysine	4.94229e+06	1.79893e+06	1.02124e+07	3.17134e+07	2.21586e+06	1.39979e+07	2.62907e+07	2.3196e+07	4.16549e+07	0.0137693	0.00775974	0.0144041	0.00294433	0.0107532	0.0122679	0.00275618	0.0160472	0.00245036
L-Malic acid	65619.4	65619.4	238495	5.34975e+06	65619.4	161645	3.84112e+06	538046	6.05804e+06	0.000182817	0.000283051	0.000336385	0.000496681	0.00031844	0.000141667	0.000402683	0.000372224	0.000356366
Norvaline	4.64117e+06	969394	1.20769e+07	1.04558e+08	1.0447e+06	2.05411e+07	8.87106e+07	4.12056e+07	1.61468e+08	0.0129304	0.0041815	0.0170339	0.00970741	0.00506973	0.0180024	0.00929995	0.0285064	0.00949843
L-Phenylalanine	81844.1	81844.1	81844.1	87319.8	81844.1	81844.1	81844.1	81844.1	201681	0.000228019	0.000353036	0.000115437	8.10693e-06	0.000397175	7.17288e-05	8.5801e-06	5.66204e-05	1.1864e-05
L-Proline	3.09392e+06	1.6366e+06	7.70364e+06	1.37125e+08	1.71285e+06	2.37218e+07	1.5134e+08	3.09785e+07	1.98468e+08	0.00861973	0.00705951	0.0108656	0.012731	0.00831218	0.02079	0.0158657	0.0214312	0.0116749
L-Serine	163797	8088.93	239387	3.57801e+06	8088.93	481112	2.20311e+06	587041	2.93899e+06	0.000456343	3.48917e-05	0.000337643	0.000332189	3.92542e-05	0.00042165	0.000230962	0.00040612	0.000172887
Thyroxine	6812.31	6812.31	35121	78094.8	6812.31	6812.31	65919.1	6812.31	66870.9	1.89792e-05	2.93851e-05	4.95365e-05	7.25047e-06	3.3059e-05	5.97037e-06	6.91061e-06	4.71281e-06	3.9337e-06
L-Tryptophan	17133.6	8960.16	8960.16	3.44662e+07	8960.16	16737.8	2.05317e+06	9590.86	6.57107e+07	4.77345e-05	3.86498e-05	1.26379e-05	0.0031999	4.34821e-05	1.46691e-05	0.000215243	6.63504e-06	0.00386546
L-Tyrosine	1.8483e+06	1.8483e+06	1.8483e+06	1.8483e+06	1.8483e+06	1.8483e+06	1.8483e+06	1.8483e+06	7.26593e+06	0.00514941	0.00797268	0.00260694	0.0001716	0.00896948	0.00161987	0.000193766	0.00127867	0.000427421
(-)-Matairesinol	5033.51	5033.51	5033.51	5033.51	5033.51	5033.51	5033.51	5033.51	5033.51	1.40235e-05	2.17121e-05	7.09951e-06	4.6732e-07	2.44267e-05	4.41141e-06	5.27686e-07	3.48222e-06	2.96098e-07
Myristic acid	6434.23	6434.23	6434.23	8354.14	6434.23	6434.23	6434.23	6434.23	12746.3	1.79259e-05	2.77542e-05	9.07516e-06	7.75614e-07	3.12242e-05	5.63901e-06	6.7453e-07	4.45125e-06	7.49804e-07
N-Alpha-acetyllysine	31069.7	10582.3	80631.2	4.11381e+06	10582.3	238267	5.14621e+06	285164	6.21991e+06	8.65607e-05	4.56472e-05	0.000113726	0.000381934	5.13543e-05	0.000208819	0.000539502	0.000197279	0.000365888
N-Acetylglutamic acid	692061	692061	692061	692061	692061	692061	692061	692061	692061	0.0019281	0.00298522	0.000976118	6.42523e-05	0.00335845	0.000606528	7.2552e-05	0.000478774	4.07108e-05
N-Acetylglutamine	6117.18	6117.18	6117.18	70882.3	6117.18	8236.41	82237.1	60347	159191	1.70426e-05	2.63866e-05	8.62798e-06	6.58084e-06	2.96856e-05	7.21846e-06	8.6213e-06	4.17485e-05	9.36445e-06
N-Acetyl-L-alanine	6.81685e+06	6.81685e+06	6.81685e+06	6.81685e+06	6.81685e+06	6.81685e+06	7.33282e+06	6.81685e+06	1.05349e+07	0.0189919	0.0294046	0.00961483	0.000632889	0.033081	0.00597435	0.000768734	0.00471595	0.000619721
N-Acetyl-L-methionine	116165	15781.6	216480	1.28347e+07	14908	276456	1.53457e+07	751601	2.22254e+07	0.000323639	6.80741e-05	0.000305334	0.0011916	7.23461e-05	0.000242288	0.00160876	0.000519963	0.00130742
N-Acetyl-L-phenylalanine	8485.52	18309.6	15184.2	8485.52	8485.52	8485.52	8485.52	8485.52	8485.52	2.36408e-05	7.89789e-05	2.14166e-05	7.87811e-07	4.11787e-05	7.43678e-06	8.89576e-07	5.87035e-06	4.99163e-07
N-Acetylneuraminic acid	584059	9036.9	3.1492e+06	3.29795e+07	38458	4.13531e+06	5.13872e+07	9.6843e+06	6.65587e+07	0.0016272	3.89808e-05	0.00444179	0.00306188	0.00018663	0.00362422	0.00538716	0.00669967	0.00391534
N-Acetylvaline	541495	541495	541495	601232	541495	541495	818577	541495	541495	0.00150862	0.00233575	0.000763752	5.58195e-05	0.00262778	0.000474571	8.58152e-05	0.000374611	3.18537e-05
N-Formyl-L-methionine	5030.97	5030.97	5030.97	38882.2	5030.97	5030.97	47942.2	5030.97	86219.8	1.40164e-05	2.17012e-05	7.09593e-06	3.6099e-06	2.44144e-05	4.40918e-06	5.02601e-06	3.48046e-06	5.07191e-06
Niacinamide	8.65877e+06	2.5163e+06	3.1492e+07	5.35623e+08	2.46556e+06	4.30249e+07	6.17254e+08	7.20185e+07	8.62567e+08	0.0241235	0.0108541	0.0444178	0.0497283	0.011965	0.0377074	0.0647096	0.049823	0.0507408
Nicotinic acid	844707	844707	844707	844707	844707	844707	844707	844707	1.15622e+06	0.00235337	0.00364366	0.00119142	7.84242e-05	0.00409922	0.000740308	8.85546e-05	0.000584375	6.80151e-05
N-Oleoylethanolamine	540637	665898	706316	5.4331e+06	377477	608213	5.67162e+06	399267	7.85894e+06	0.00150623	0.00287236	0.000996224	0.000504419	0.00183183	0.000533043	0.000594582	0.000276216	0.000462305
Octadecanamide	6.52984e+06	4.91073e+06	1.61939e+06	1.25138e+08	3.66582e+06	7.17832e+06	848298	848298	2.61769e+08	0.0181923	0.0211825	0.00228407	0.011618	0.0177896	0.00629114	8.89311e-05	0.000586859	0.0153987
Orotic acid	19526.4	19526.4	19526.4	31350.5	19526.4	19526.4	19526.4	19526.4	19526.4	5.44008e-05	8.42273e-05	2.7541e-05	2.91064e-06	9.4758e-05	1.71131e-05	2.04704e-06	1.35085e-05	1.14864e-06
Oxidized glutathione	174480	81795.8	2.47173e+06	1.12314e+08	56524.2	2.43609e+06	1.23458e+08	5.75909e+06	1.84234e+08	0.000486105	0.000352828	0.00348625	0.0104275	0.000274302	0.00213501	0.0129427	0.00398418	0.0108376
L-Palmitoylcarnitine	5.65994e+06	1.78406e+06	8.14876e+06	1.86393e+08	900581	3.15569e+07	3.61888e+08	3.58618e+07	8.6997e+08	0.0157687	0.00769556	0.0114934	0.017305	0.00437037	0.0276568	0.0379384	0.0248095	0.0511763
Pantothenol	10219.3	7648.03	22208.8	3.72219e+06	7648.03	78782.7	3.29423e+06	155630	3.88655e+06	2.84712e-05	3.29899e-05	3.13245e-05	0.000345575	3.71146e-05	6.90458e-05	0.00034535	0.000107666	0.000228628
Pentadecanoic acid	6498.04	6498.04	6498.04	10399.9	6498.04	6498.04	6498.04	6498.04	6498.04	1.81037e-05	2.80294e-05	9.16517e-06	9.65546e-07	3.15339e-05	5.69494e-06	6.8122e-07	4.4954e-06	3.8225e-07
Petroselinic acid	275531	275531	275531	275531	275531	275531	275531	275531	275531	0.000767634	0.00118851	0.000388622	2.55808e-05	0.0013371	0.000241477	2.88852e-05	0.000190614	1.62082e-05
Phenylglyoxylic acid	351684	351684	351684	351684	351684	351684	351684	351684	1.69981e+06	0.000979798	0.00151699	0.000496032	3.2651e-05	0.00170666	0.000308218	3.68686e-05	0.000243297	9.9992e-05
Pipecolic acid	910656	342589	1.90548e+06	1.40562e+07	421228	2.84038e+06	1.48682e+07	4.73992e+06	7.93618e+06	0.00253711	0.00147776	0.00268759	0.001305	0.00204414	0.00248933	0.00155871	0.00327912	0.000466849
Pregnenolone	28614.5	9167.26	8585.5	1.62001e+06	8658.55	159307	325434	102742	1.74806e+06	7.97207e-05	3.95432e-05	1.21094e-05	0.000150404	4.20185e-05	0.000139618	3.41167e-05	7.10779e-05	0.00010283
Progesterone	3.68385e+06	2.17916e+06	1.62087e+07	3.20772e+08	1.2967e+06	1.67741e+07	1.79024e+08	2.26362e+07	2.30421e+08	0.0102633	0.00939985	0.0228616	0.029781	0.00629265	0.014701	0.0187679	0.0156599	0.0135546
Prostaglandin E2	88986.9	88986.9	150627	7.78664e+06	88986.9	306729	4.76177e+06	375023	1.53412e+07	0.000247919	0.000383847	0.000212451	0.000722927	0.000431838	0.00026882	0.000499199	0.000259444	0.000902451
Prostaglandin F2a	11932.6	11932.6	11932.6	11932.6	11932.6	11932.6	11932.6	11932.6	11932.6	3.32444e-05	5.14713e-05	1.68303e-05	1.10784e-06	5.79066e-05	1.04578e-05	1.25095e-06	8.25504e-06	7.01937e-07
Purine	7893.85	7893.85	7893.85	7893.85	7893.85	9573.38	7893.85	7893.85	103861	2.19924e-05	3.40503e-05	1.11339e-05	7.3288e-07	3.83075e-05	8.39019e-06	8.2755e-07	5.46103e-06	6.10965e-06
Pyridoxal	930915	930915	930915	1.16229e+06	930915	930915	930915	930915	7.94614e+06	0.00259355	0.00401552	0.00131301	0.000107909	0.00451757	0.000815862	9.75922e-05	0.000644015	0.000467434
Pyridoxal 5'-phosphate	32035.7	32035.7	32035.7	141650	32035.7	32035.7	34809.2	32035.7	32035.7	8.92521e-05	0.000138187	4.51847e-05	1.31511e-05	0.000155464	2.80763e-05	3.64921e-06	2.21625e-05	1.88451e-06
Pyroglutamic acid	7.27402e+07	7.27402e+07	7.27402e+07	7.27402e+07	7.27402e+07	7.27402e+07	9.20954e+07	7.27402e+07	8.20816e+07	0.202656	0.313766	0.102596	0.00675334	0.352996	0.0637501	0.00965479	0.0503223	0.00482848
Quinic acid	6623.94	6623.94	6780.64	7382.77	6623.94	7508.82	172187	6623.94	130659	1.84544e-05	2.85725e-05	9.56376e-06	6.8543e-07	3.21449e-05	6.58079e-06	1.80511e-05	4.5825e-06	7.68609e-06
Retinal	24059.8	56711.1	24059.8	24059.8	24059.8	29540.3	24059.8	24059.8	49527.1	6.70311e-05	0.000244624	3.39352e-05	2.23376e-06	0.000116758	2.58893e-05	2.5223e-06	1.66448e-05	2.91345e-06
Rhamnose	36345.9	36345.9	36345.9	2.62119e+06	36345.9	36345.9	1.56343e+06	48091.6	4.59876e+06	0.00010126	0.000156779	5.12641e-05	0.000243356	0.00017638	3.18538e-05	0.000163902	3.32701e-05	0.000270524
Riboflavin	74371.7	26927.3	283416	2.68909e+07	29887.6	886775	1.63652e+07	1.64183e+06	6.97013e+07	0.000207201	0.000116152	0.000399744	0.0024966	0.000145039	0.000777177	0.00171564	0.00113583	0.0041002
Ribothymidine	22146.8	12049.1	276964	3.70866e+06	9937.7	460433	8.52505e+06	500965	1.10841e+07	6.17016e-05	5.19741e-05	0.000390644	0.000344319	4.82259e-05	0.000403527	0.00089372	0.000346572	0.000652024
Salicin	354476	354476	354476	354476	354476	354476	619105	354476	1.02087e+06	0.000987577	0.00152904	0.00049997	3.29102e-05	0.00172021	0.000310665	6.49037e-05	0.000245229	6.00533e-05
Salicylic acid	8556.14	8556.14	8556.14	8556.14	8556.14	8556.14	8556.14	8556.14	8556.14	2.38376e-05	3.69071e-05	1.2068e-05	7.94368e-07	4.15214e-05	7.49867e-06	8.9698e-07	5.9192e-06	5.03318e-07
Sebacic acid	914572	914572	914572	1.10346e+06	914572	914572	914572	914572	1.53911e+06	0.00254802	0.00394502	0.00128996	0.000102447	0.00443826	0.000801538	9.58788e-05	0.000632708	9.05388e-05
Deoxycholic acid glycine conjugate	97234.4	97234.4	97234.4	276410	97234.4	97234.4	566067	106420	2.8173e+06	0.000270897	0.000419423	0.000137144	2.56625e-05	0.000471862	8.52171e-05	5.93435e-05	7.36225e-05	0.000165729
Taurodeoxycholic acid	11349.6	11349.6	11349.6	99027.5	11349.6	317989	146882	11349.6	1.04978e+06	3.16202e-05	4.89566e-05	1.6008e-05	9.1939e-06	5.50775e-05	0.000278688	1.53983e-05	7.85173e-06	6.17536e-05
Sorbitol	1.44606e+06	853831	7.51088e+06	1.41271e+08	549546	9.24049e+06	2.30087e+08	2.59694e+07	2.27224e+08	0.00402877	0.00368302	0.0105937	0.0131158	0.00266685	0.00809844	0.0241211	0.0179658	0.0133666
Spermine	88502.1	10579	10579	1.75398e+07	10579	210171	6.25794e+06	473629	2.16031e+07	0.000246569	4.56329e-05	1.49212e-05	0.00162843	5.13382e-05	0.000184195	0.000656049	0.000327661	0.00127081
Suberic acid	393104	414018	303688	303688	430702	407939	303688	303688	303688	0.0010952	0.00178588	0.000428337	2.81949e-05	0.00209012	0.000357521	3.1837e-05	0.000210094	1.78645e-05
Succinic acid	10890.5	7009.32	7009.32	34250.9	7009.32	19895.9	7009.32	7009.32	7009.32	3.03412e-05	3.02348e-05	9.88629e-06	3.17992e-06	3.4015e-05	1.74369e-05	7.34819e-07	4.8491e-06	4.12326e-07
Taurine	4.1155e+06	2.39386e+06	1.17242e+07	5.6776e+06	2.50126e+06	1.73633e+07	5.17232e+06	1.7355e+07	7.69337e+06	0.0114659	0.010326	0.0165364	0.000527119	0.0121382	0.0152173	0.000542238	0.0120063	0.000452565
Taurocholic Acid	34369.3	34369.3	34369.3	34369.3	34369.3	2.83436e+06	72337.8	46625.1	1.91117e+07	9.57536e-05	0.000148253	4.84762e-05	3.19091e-06	0.000166788	0.00248405	7.58351e-06	3.22556e-05	0.00112425
Testosterone	450677	450677	450677	450677	450677	450677	450677	450677	450677	0.0012556	0.001944	0.000635657	4.18417e-05	0.00218706	0.000394977	4.72466e-05	0.000311782	2.65112e-05
Tetradecanedioic acid	231586	259105	291714	1.1951e+06	271132	307499	1.12688e+06	231586	2.05966e+06	0.000645202	0.00111766	0.000411449	0.000110955	0.00131575	0.000269494	0.000118136	0.000160213	0.00012116
Theophylline	18702.7	37301.5	157071	260425	18702.7	93989.1	30670.3	101589	18702.7	5.21062e-05	0.000160901	0.000221541	2.41783e-05	9.07611e-05	8.23728e-05	3.21531e-06	7.02804e-05	1.10019e-06
Thiamine	9223.61	9223.61	109799	4.18781e+06	9223.61	314090	7.12085e+06	1.24685e+06	26183.6	2.56972e-05	3.97862e-05	0.000154867	0.000388804	4.47606e-05	0.000275271	0.000746512	0.000862579	1.54026e-06
Thymine	3.67423e+06	3.67423e+06	3.67423e+06	3.67423e+06	3.67423e+06	3.67423e+06	3.67423e+06	3.67423e+06	3.67423e+06	0.0102365	0.0158489	0.00518231	0.000341122	0.0178304	0.00322012	0.000385186	0.00254186	0.000216138
trans-Ferulic acid	9543.35	9543.35	9543.35	25439.3	9543.35	9543.35	9543.35	9543.35	49752.7	2.6588e-05	4.11654e-05	1.34604e-05	2.36184e-06	4.63122e-05	8.36387e-06	1.00047e-06	6.60216e-06	2.92672e-06
Trizma Acetate	564647	44064.3	528296	1.87244e+06	44064.3	44064.3	1.50323e+06	61922	1.08084e+06	0.00157312	0.000190072	0.000745135	0.000173841	0.000213836	3.86183e-05	0.00015759	4.28381e-05	6.35805e-05
Tryptamine	12413.7	12413.7	12413.7	12413.7	12413.7	12413.7	12413.7	12413.7	19827.1	3.45847e-05	5.35466e-05	1.75089e-05	1.15251e-06	6.02414e-05	1.08794e-05	1.30138e-06	8.58787e-06	1.16634e-06
Tryptophanol	359077	359077	359077	359077	359077	359077	359077	359077	779968	0.0010004	0.00154888	0.00050646	3.33374e-05	0.00174254	0.000314698	3.76437e-05	0.000248412	4.58819e-05
Tyramine	227413	227413	227413	227413	227413	227413	227413	227413	731273	0.000633576	0.000980949	0.000320754	2.11134e-05	0.00110359	0.000199306	2.38407e-05	0.000157326	4.30174e-05
Uridine	7.80932e+06	2.78135e+06	3.08563e+07	4.43811e+08	2.55635e+06	3.88189e+07	5.42531e+08	5.03538e+07	6.59765e+08	0.0217569	0.0119974	0.0435213	0.0412043	0.0124055	0.0340212	0.0568761	0.0348352	0.0388109
Ursodeoxycholic acid	5.66603e+06	5.66603e+06	5.66603e+06	5.66603e+06	5.66603e+06	5.66603e+06	5.66603e+06	5.66603e+06	5.66603e+06	0.0157857	0.0244405	0.00799165	0.000526045	0.0274962	0.00496575	0.000593996	0.0039198	0.000333306
Valeric acid	513165	383600	351976	351976	489946	351976	351976	351976	351976	0.00142969	0.00165466	0.000496444	3.26781e-05	0.00237762	0.000308475	3.68993e-05	0.0002435	2.07051e-05
Xanthosine	50922.7	6861.16	160801	1.66652e+07	8030.34	411032	1.38811e+07	973816	2.65084e+07	0.000141872	2.95957e-05	0.000226802	0.00154723	3.89699e-05	0.000360232	0.00145522	0.000673694	0.00155936

## Sheet: CLUSTER
	Control-1	Control-2	Control-3	Control-4	Case-1	Case-2	Case-3	Case-4
Xanthurenic acid	2.58119e-05	3.83725e-05	1.25472e-05	1.21604e-05	7.79642e-06	6.22056e-06	6.15423e-06	7.80437e-06		1.46084e-05
D-Glucuronic acid	0.000378421	0.000102032	6.66558e-05	3.98719e-05	2.19526e-05	4.51849e-05	1.63639e-05	1.64951e-05		8.58721e-05
Glyceraldehyde	0.00746061	0.00728297	0.0125748	0.00973692	0.0159743	0.0138341	0.0151161	0.01287		0.0118562
Glycocholic acid	6.73487e-05	0.000104274	4.81128e-05	0.000175476	0.00923576	0.000918546	0.00100093	0.0207475		0.00403725
Levulinic acid	2.93569e-05	4.54525e-05	1.48622e-05	7.61015e-06	9.2349e-06	5.92646e-06	7.28973e-06	2.12665e-06		1.52324e-05
L-Proline	0.00861973	0.00705951	0.0108656	0.012731	0.02079	0.0158657	0.0214312	0.0116749		0.0136297
Thyroxine	1.89792e-05	2.93851e-05	4.95365e-05	7.25047e-06	5.97037e-06	6.91061e-06	4.71281e-06	3.9337e-06		1.58348e-05
N-Oleoylethanolamine	0.00150623	0.00287236	0.000996224	0.000504419	0.000533043	0.000594582	0.000276216	0.000462305		0.000968172
L-Palmitoylcarnitine	0.0157687	0.00769556	0.0114934	0.017305	0.0276568	0.0379384	0.0248095	0.0511763		0.0242305
	Control-1	Control-2	Control-3	Control-4	Case-1	Case-2	Case-3	Case-4
Xanthurenic acid	1.76691	2.62674	0.858899	0.832422	0.533692	0.42582	0.421279	0.534237
D-Glucuronic acid	4.4068	1.18818	0.776222	0.464317	0.255643	0.526188	0.190562	0.192089
Glyceraldehyde	0.629257	0.614274	1.0606	0.82125	1.34733	1.16682	1.27495	1.08551
Glycocholic acid	0.0166818	0.025828	0.0119172	0.0434643	2.28764	0.227518	0.247923	5.13903		80.7232
Levulinic acid	1.92726	2.98393	0.975695	0.499601	0.606266	0.389068	0.478566	0.139613
L-Proline	0.632423	0.517951	0.7972	0.934061	1.52534	1.16405	1.57239	0.856581
Thyroxine	1.19858	1.85572	3.12832	0.457881	0.37704	0.436418	0.297623	0.248421
N-Oleoylethanolamine	1.55574	2.96679	1.02897	0.521001	0.550566	0.614128	0.285297	0.477503
L-Palmitoylcarnitine	0.650781	0.317599	0.474337	0.714186	1.1414	1.56573	1.0239	2.11206
					Glycocholic acid				Glycocholic acid	L-Palmitoylcarnitine
						0.0166818	2.28764		0.0166818	0.650781
						0.025828	0.227518		0.025828	0.317599
						0.0119172	0.247923		0.0119172	0.474337
						0.0434643	5.13903		0.0434643	0.714186
					L-Palmitoylcarnitine				2.28764	1.1414
						0.650781	1.1414		0.227518	1.56573
						0.317599	1.56573		0.247923	1.0239
						0.474337	1.0239		5.13903	2.11206
						0.714186	2.11206
																	Glycocholic acid											L-Palmitoylcarnitine					ACOX
				L-Palmitoylcarnitine	Control	Glycocholic acid			Control	Glycocholic acid		L-Palmitoylcarnitine	Control	Glycocholic acid			Case	Control					Control	Glycocholic acid			Case	Control		Control	Glycocholic acid			Case	Control
					52	109.2		64	0.8125	1.70625			60	222.6	3.71	62.3	0.963082	3.57303					57	203.775	3.575	62.44	0.912876	3.26353		55	184.91	3.362	62.48	0.880282	2.95951
					60	126		66.4	0.903614	1.89759			54	280.422	5.193	62.3469	0.866121	4.49777					53	102.449	1.933	62.551	0.847308	1.63785		64	81.088	1.267	62.6327	1.02183	1.29466
					69	144.9		68	1.01471	2.13088			74	714.396	9.654	62.5208	1.18361	11.4265					63	145.026	2.302	62.75	1.00398	2.31117		74	169.682	2.293	62.6042	1.18203	2.71039
					75	157.5		67.6667	1.10837	2.32759			62	215.574	3.477	62.2766	0.995559	3.46156					63	146.853	2.331	62.7447	1.00407	2.34049		67	159.527	2.381	62.3617	1.07438	2.55809
					56	117.6		64.3333	0.870466	1.82798			67	673.149	10.047	62.2826	1.07574	10.808					58	170.056	2.932	62.7391	0.924463	2.71053		63	127.071	2.017	62.2609	1.01187	2.04094
					72	151.2		62.6667	1.14894	2.41277			58	674.018	11.621	62.1778	0.932809	10.8402					69	111.159	1.611	62.8444	1.09795	1.7688		67	189.945	2.835	62.2444	1.0764	3.0516
													75	1440.67	19.209	62.2727	1.20438	23.1349					72	213.552	2.966	62.7045	1.14824	3.40569		55	169.345	3.079	62.1364	0.88515	2.72538
													67	528.831	7.893	61.9767	1.08105	8.53273					65	221.13	3.402	62.4884	1.04019	3.53874		52	124.956	2.403	62.3023	0.83464	2.00564
													69	948.543	13.747	61.8571	1.11547	15.3344					55	129.69	2.358	62.4286	0.881007	2.07741		57	148.656	2.608	62.5476	0.911306	2.37669
				ACOX	Control	Glycocholic acid			Control	Glycocholic acid			64	520.448	8.132	61.6829	1.03756	8.43747					56	92.96	1.66	62.6098	0.894429	1.48475		74	234.062	3.163	62.6829	1.18054	3.73406
					65	110.5		58.3333	1.11429	1.89429			50	515.9	10.318	61.625	0.811359	8.3716					60	224.7	3.745	62.775	0.955795	3.57945		62	82.398	1.329	62.4	0.99359	1.32048
					51	86.7		57	0.894737	1.52105			71	444.744	6.264	61.9231	1.14658	7.1822					64	159.104	2.486	62.8462	1.01836	2.53164		64	148.928	2.327	62.4103	1.02547	2.38627
					60	102		58.5	1.02564	1.74359			53	468.997	8.849	61.6842	0.859215	7.60319					69	71.622	1.038	62.8158	1.09845	1.14019		71	164.081	2.311	62.3684	1.1384	2.63083
					52	88.4		57.5	0.904348	1.53739			50	614.95	12.299	61.9189	0.807508	9.93154					57	202.863	3.559	62.6486	0.909836	3.23811		73	127.677	1.749	62.1351	1.17486	2.05483
					61	103.7		57.75	1.05628	1.79567			74	233.692	3.158	62.25	1.18876	3.75409					59	218.772	3.708	62.8056	0.939407	3.48332		54	139.158	2.577	61.8333	0.873315	2.25053
					61	103.7		56.5	1.07965	1.8354			56	479.92	8.57	61.9143	0.904476	7.75136					62	168.454	2.717	62.9143	0.985468	2.67752		63	77.742	1.234	62.0571	1.01519	1.25275
													63	887.355	14.085	62.0882	1.01468	14.2918					51	156.366	3.066	62.9412	0.81028	2.48432		57	174.078	3.054	62.0294	0.918919	2.80638
													58	567.124	9.778	62.0606	0.93457	9.13823					56	65.128	1.163	63.303	0.884634	1.02883		50	117.3	2.346	62.1818	0.804094	1.8864
				apoptosis rate	Control	Glycocholic acid			Control	Glycocholic acid			51	887.247	17.397	62.1875	0.820101	14.2673					53	155.979	2.943	63.5312	0.834235	2.45515		62	196.292	3.166	62.5625	0.991009	3.13753
					56	100.8		53.1667	1.05329	1.89592			57	702.012	12.316	62.5484	0.911294	11.2235					52	75.14	1.445	63.871	0.814141	1.17643		73	218.489	2.993	62.5806	1.16649	3.49132
					53	90.1		52.6	1.0076	1.71293			52	993.044	19.097	62.7333	0.828905	15.8296					64	130.176	2.034	64.2667	0.995851	2.02556		56	135.352	2.417	62.2333	0.899839	2.17491
					56	84		52.5	1.06667	1.6			57	565.611	9.923	63.1034	0.903279	8.96323					74	158.36	2.14	64.2759	1.15129	2.46376		68	143.344	2.108	62.4483	1.0889	2.2954
					53	100.7		51.3333	1.03247	1.96169			68	731.272	10.754	63.3214	1.07389	11.5486					64	157.44	2.46	63.9286	1.00112	2.46275		54	71.496	1.324	62.25	0.86747	1.14853
					50	100		51.3333	0.974026	1.94805			56	859.32	15.345	63.1481	0.886804	13.608					55	71.5	1.3	63.9259	0.860371	1.11848		68	73.576	1.082	62.5556	1.08703	1.17617
					51	127.5		55.3333	0.921687	2.30422			50	724.65	14.493	63.4231	0.788357	11.4257					64	184.256	2.879	64.2692	0.995811	2.86694		55	148.445	2.699	62.3462	0.882171	2.38098
													69	1300.44	18.847	63.96	1.0788	20.3321					62	122.45	1.975	64.28	0.96453	1.90495		66	171.336	2.596	62.64	1.05364	2.73525
													56	871.248	15.558	63.75	0.878431	13.6666					60	162.06	2.701	64.375	0.932039	2.51744		56	135.688	2.423	62.5	0.896	2.17101
													53	626.725	11.825	64.087	0.827001	9.77929					60	127.44	2.124	64.5652	0.929293	1.97382		73	202.356	2.772	62.7826	1.16274	3.22312
				ARP29	Control	Glycocholic acid			Control	Glycocholic acid			70	1082.83	15.469	64.5909	1.08374	16.7644					74	246.494	3.331	64.7727	1.14246	3.80552		56	128.408	2.293	62.3182	0.898614	2.06052
					53	58.3		55.3333	0.957831	1.05361			65	213.33	3.282	64.3333	1.01036	3.31601					65	251.42	3.868	64.3333	1.01036	3.90808		70	84.98	1.214	62.619	1.11787	1.3571
					62	80.6		55.8	1.11111	1.44444			57	225.606	3.958	64.3	0.88647	3.50865					69	251.436	3.644	64.3	1.07309	3.91036		67	120.734	1.802	62.25	1.07631	1.9395
					59	88.5		53.6	1.10075	1.65112			68	849.592	12.494	64.6842	1.05126	13.1345					68	199.852	2.939	64.0526	1.06163	3.12012		53	54.749	1.033	62	0.854839	0.883048
					51	76.5		52.2	0.977011	1.46552			74	1089.87	14.728	64.5	1.14729	16.8972					74	249.824	3.376	63.8333	1.15927	3.91369		74	217.708	2.942	62.5	1.184	3.48333
					54	70.2		52.4	1.03053	1.33969			51	480.573	9.423	63.9412	0.797608	7.51586					75	141.3	1.884	63.2353	1.18605	2.23451		73	166.294	2.278	61.8235	1.18078	2.68982
					53	116.6		54	0.981481	2.15926			52	777.608	14.954	64.75	0.803089	12.0094					52	141.544	2.722	62.5	0.832	2.2647		75	139.425	1.859	61.125	1.22699	2.28098
													57	1125.75	19.75	65.6	0.868902	17.1608					60	178.5	2.975	63.2	0.949367	2.82437		69	178.158	2.582	60.2	1.14618	2.95944
				apoptosis rate	Control	Glycocholic acid			Control	Glycocholic acid			73	276.232	3.784	66.2143	1.10248	4.17179					62	107.756	1.738	63.4286	0.977477	1.69886		56	121.464	2.169	59.5714	0.940048	2.03896
					51	76.5		54.6667	0.932927	1.39939			74	1105.56	14.94	65.6923	1.12646	16.8294					62	73.098	1.179	63.5385	0.975787	1.15045		71	158.259	2.229	59.8462	1.18638	2.64443
					52	78		55.4	0.938628	1.40794			66	601.326	9.111	65	1.01538	9.25117					62	186	3	63.6667	0.973822	2.92147		54	74.412	1.378	58.9167	0.916549	1.263
					52	78		56.25	0.924444	1.38667			58	291.218	5.021	64.9091	0.893557	4.48655					70	185.99	2.657	63.8182	1.09687	2.91437		60	140.76	2.346	59.3636	1.01072	2.37115
					62	117.8		57.6667	1.07514	2.04277			69	606.441	8.789	65.6	1.05183	9.24453					65	172.77	2.658	63.2	1.02848	2.7337		75	233.25	3.11	59.3	1.26476	3.93339
					60	156		56	1.07143	2.78571			75	505.575	6.741	65.2222	1.14991	7.75158					71	201.498	2.838	63	1.12698	3.19838		56	121.072	2.162	57.5556	0.972973	2.10357
					51	117.3		55.3333	0.921687	2.11988			71	177.713	2.503	64	1.10938	2.77677					52	162.292	3.121	62	0.83871	2.61761		58	199.694	3.443	57.75	1.00433	3.4579
													71	714.26	10.06	63	1.12698	11.3375					55	56.43	1.026	63.4286	0.867117	0.889662		75	211.275	2.817	57.7143	1.2995	3.66071
													69	368.736	5.344	61.6667	1.11892	5.9795					73	196.516	2.692	64.8333	1.12596	3.0311		52	172.484	3.317	54.8333	0.948328	3.1456
													60	800.34	13.339	60.2	0.996678	13.2947					71	108.346	1.526	63.2	1.12342	1.71434		68	182.784	2.688	55.4	1.22744	3.29935
				ARP29	Control	Glycocholic acid			Control	Glycocholic acid			52	462.228	8.889	60.25	0.863071	7.67183					62	69.564	1.122	61.25	1.01224	1.13574		52	62.764	1.207	52.25	0.995215	1.20122
					57	74.1		59.6667	0.955307	1.2419			67	236.242	3.526	63	1.06349	3.74987					61	67.893	1.113	61	1	1.113		53	112.413	2.121	52.3333	1.01274	2.14802
					58	69.6		60.2	0.963455	1.15615			56	838.768	14.978	61	0.918033	13.7503					52	85.332	1.641	61	0.852459	1.39889		51	91.29	1.79	52	0.980769	1.75558
					59	94.4		60.75	0.971193	1.55391			66	455.73	6.905	66	1	6.905					70	96.39	1.377	70	1	1.377		53	143.365	2.705	53	1	2.705
					60	84		61.3333	0.978261	1.36957
					62	124		62	1	2
					62	148.8		62	1	2.4

## Sheet: RESULT
1		VIP(8)	VIP(9)	FOLD9	p9	*9	FOLD8	p8	*8
128	Glycocholic acid	1.68732	2.62059	64.816	0.0251368	*	80.7232	0.00431265	*	475-31-0	C01921	HMDB00138	Primary bile acid biosynthesis	Lipid metabolism	Metabolism	4
103	Glyceraldehyde	1.60116	2.60283	1.47022	0.0262098	*	1.55969	0.0105053	*	56-82-6	C00661	HMDB01051				0
205	L-Palmitoylcarnitine	1.58004	2.0123	2.23412	0.105835		2.70902	0.00647013	*	6865-14-1	C02990	HMDB00222	Fatty acid degradation	Lipid metabolism	Metabolism	2
261	Trizma Acetate	1.51092	2.58836	0.154044	0.0279372	*	0.112829	0.0211197	*	6850-28-8
170	L-Proline	1.4763	2.07399	1.59027	0.0891743		1.7762	0.0247491	*	147-85-3	C00148	HMDB00162	Arginine and proline metabolism	Amino acid metabolism	Metabolism	12
96	D-Glucuronic acid	1.44198	2.12286	0.292732	0.0927403		0.170357	0.0325334	*	6556-12-3	C16245	HMDB00127				0
38	Xanthurenic acid	1.35634	1.04794	0.640289	0.18842		0.314714	0.0113666	*	59-00-7	C02470	HMDB00881	Tryptophan metabolism	Amino acid metabolism	Metabolism	1
234	Ribothymidine	1.33039	1.69488	2.20972	0.176794		2.70532	0.0577925
172	Thyroxine	1.32539	1.78773	0.415299	0.110174		0.204729	0.0170809	*	51-48-9	C01829	HMDB00248	Tyrosine metabolism	Amino acid metabolism	Metabolism	7
95	Glucosamine 6-phosphate	1.31556	1.7735	2.92401	0.1545		3.6194	0.0618184
159	L-Dopa	1.31291	1.99698	1.99655	0.0875323		2.25095	0.0487396	*	59-92-7	C00355	HMDB00181	Tyrosine metabolism	Amino acid metabolism	Metabolism	13
191	N-Acetylneuraminic acid	1.28966	1.39615	1.72854	0.2858		2.14032	0.06924
134	Histamine	1.28545	1.12659	0.548984	0.403018		0.1949	0.0704939
72	Biotin	1.27557	1.70742	0.42794	0.19468		0.265966	0.0734872
106	Dodecanedioic acid	1.27542	0.707543	0.794807	0.397431		0.505066	0.0522035
160	Levulinic acid	1.26614	0.947968	0.622629	0.23312		0.252645	0.043515	*	123-76-2		HMDB00720
13	2-Hydroxyestrone	1.26507	1.4702	0.588481	0.175766		0.381984	0.0571658
223	Pyridoxal 5'-phosphate	1.23835	0.943931	0.591337	0.220214		0.195163	0.0686956
64	Argininosuccinic acid	1.23766	2.18506	0.531437	0.0812146		0.479462	0.0720617
78	cis-Aconitic acid	1.23304	0.907968	0.638808	0.264571		0.271544	0.087213
22	3,4,5-Trimethoxycinnamic acid	1.22885	0.972046	0.579878	0.4297		0.190646	0.0886399
133	Hippuric acid	1.22053	0.900099	0.623372	0.289705		0.238997	0.0731695
197	N-Oleoylethanolamine	1.19876	1.61149	0.503192	0.177199		0.317413	0.0481609	*	111-58-0		HMDB02088
116	Ethylmalonic acid	1.19605	0.910847	0.595726	0.444002		0.195856	0.100277
242	Sorbitol	1.19447	1.42017	1.68596	0.265555		2.02257	0.0991926
269	Valeric acid	1.18945	0.667229	0.661347	0.463103		0.168696	0.102718
93	Deoxycholic acid	1.188	1.12407	0.514971	0.411026		0.16141	0.103258
114	Estriol	1.18355	0.877343	0.605647	0.334342		0.199118	0.104929
257	trans-Ferulic acid	1.17743	0.856787	0.624157	0.383699		0.226061	0.107248
201	Orotic acid	1.17378	0.865572	0.608353	0.374552		0.200008	0.10865
208	Pentadecanoic acid	1.17366	0.865427	0.608386	0.375117		0.200018	0.108696
252	Tetradecanedioic acid	1.17104	0.718697	0.694803	0.422558		0.292747	0.109178
70	Beta-Alanine	1.16606	0.855132	0.611962	0.423905		0.202972	0.111642
14	2-Hydroxycaproic acid	1.16604	0.854775	0.612449	0.418274		0.203752	0.111648
118	Fumaric acid	1.16268	0.834545	0.635664	0.39871		0.240101	0.112964
117	Folic acid	1.16189	0.850929	0.612181	0.44372		0.201904	0.113275
181	Myristic acid	1.16181	0.848009	0.615712	0.456072		0.207355	0.113306
237	Sebacic acid	1.1611	0.848131	0.614694	0.458855		0.205526	0.113586
69	Benzocaine	1.16033	0.849462	0.612101	0.454783		0.20124	0.113891
89	Cytosine	1.16023	0.847683	0.614195	0.463093		0.204452	0.113929
11	Deoxycytidine	1.15977	0.803165	0.689762	0.335622		0.336495	0.0905169
6	17-Hydroxyprogesterone	1.15952	0.848492	0.612329	0.461058		0.201315	0.114212
7	1-Monolauroyl-Rac-Glycerol	1.15952	0.848493	0.612329	0.461058		0.201315	0.114212
18	2-Methoxyestradiol	1.15952	0.848493	0.612329	0.461058		0.201315	0.114212
27	3-Indoleacetonitrile	1.15952	0.848493	0.612329	0.461058		0.201315	0.114212
49	5-Methoxytryptophol	1.15952	0.848492	0.612329	0.461058		0.201315	0.114212
54	Acetylglycine	1.15952	0.848496	0.612329	0.461058		0.201315	0.114212
85	Cyclic AMP	1.15952	0.488135	0.738758	0.493347		0.201315	0.114212
97	D-Glucurono-6,3-lactone	1.15952	0.848492	0.612329	0.461058		0.201315	0.114212
100	Dihydrotestosterone	1.15952	0.848494	0.612329	0.461058		0.201315	0.114212
119	Gallic acid	1.15952	0.848491	0.612329	0.461058		0.201315	0.114212
120	Gamma-Linolenic acid	1.15952	0.848492	0.612329	0.461058		0.201315	0.114212
158	L-Dihydroorotic acid	1.15952	0.84849	0.612329	0.461058		0.201315	0.114212
178	(-)-Matairesinol	1.15952	0.848495	0.612329	0.461058		0.201315	0.114212
184	N-Acetylglutamic acid	1.15952	0.848492	0.612329	0.461058		0.201315	0.114212
209	Petroselinic acid	1.15952	0.848493	0.612329	0.461058		0.201315	0.114212
219	Prostaglandin F2a	1.15952	0.848494	0.612329	0.461058		0.201315	0.114212
236	Salicylic acid	1.15952	0.848495	0.612329	0.461058		0.201315	0.114212
251	Testosterone	1.15952	0.848492	0.612329	0.461058		0.201315	0.114212
256	Thymine	1.15952	0.848492	0.612329	0.461058		0.201315	0.114212
268	Ursodeoxycholic acid	1.15952	0.848492	0.612329	0.461058		0.201315	0.114212
94	Deoxyinosine	1.15906	1.64235	1.3792	0.207793		1.50348	0.114396
25	3-Hydroxyphenylacetic acid	1.15879	0.847111	0.613163	0.469105		0.202357	0.114501
45	5'-Methylthioadenosine	1.15784	0.840258	0.620646	0.479646		0.213728	0.114878
195	Nicotinic acid	1.15775	0.845155	0.614346	0.479358		0.203836	0.114914
192	N-Acetylvaline	1.15752	0.843245	0.616583	0.472197		0.207303	0.115004
132	Hexadecanedioic acid	1.15663	0.842781	0.615966	0.489667		0.205974	0.115358
262	Tryptamine	1.15663	0.843078	0.615596	0.489302		0.205398	0.115357
225	Pyroglutamic acid	1.15653	0.842996	0.615625	0.484294		0.205435	0.115398
121	Gentisic acid	1.15637	0.842594	0.615887	0.491511		0.205763	0.115461
186	N-Acetyl-L-alanine	1.15622	0.842317	0.61605	0.492221		0.205967	0.115522
59	Agmatine Sulfate	1.1562	0.842276	0.616077	0.492929		0.206	0.115529
144	1H-Indole-3-acetamide	1.15528	0.843079	0.615139	0.464588		0.204828	0.115896
146	Indoleacetic acid	1.15498	0.840262	0.617238	0.490227		0.207451	0.116017
68	Benzenebutanoic acid	1.15489	0.83923	0.618318	0.5028		0.209052	0.116051
169	L-Phenylalanine	1.15389	0.837017	0.619891	0.508913		0.211174	0.116452
263	Tryptophanol	1.15378	0.837816	0.618741	0.511368		0.20933	0.116497
28	3-Indolepropionic acid	1.15324	0.83684	0.619321	0.515072		0.210055	0.116711
48	5-Methoxytryptamine	1.153	0.832942	0.62401	0.50712		0.217376	0.116809
108	Neopterin	1.152	0.807649	0.658588	0.435715		0.274508	0.117208
42	4-Hydroxycinnamic acid	1.15063	0.832133	0.622106	0.531613		0.213536	0.117759
34	3-Methylxanthine	1.1497	0.830732	0.622882	0.526845		0.214506	0.118132
264	Tyramine	1.14839	0.828142	0.624449	0.544217		0.216465	0.118664
162	Linoleic acid	1.14746	0.826398	0.625487	0.546497		0.217763	0.11904
109	D-Glucaric acid	1.14556	0.822858	0.627589	0.548361		0.22039	0.119809
174	L-Tyrosine	1.14454	0.821417	0.628363	0.549102		0.221357	0.120224
164	Lithocholic acid	1.14364	0.813788	0.636602	0.552999		0.233995	0.120593
235	Salicin	1.14337	0.818925	0.629891	0.550428		0.223267	0.120701
210	Phenylglyoxylic acid	1.13951	0.81283	0.633298	0.5536		0.227527	0.122282
113	Estradiol	1.138	0.809527	0.635324	0.555366		0.230059	0.122904
104	Isocitric acid	1.135	0.817764	0.62806	0.47972		0.220979	0.124144
193	N-Formyl-L-methionine	1.12772	0.723292	0.7307	0.462197		0.387468	0.112731
222	Pyridoxal	1.12288	0.783499	0.651804	0.568851		0.252168	0.129228
16	2-Indolecarboxylic acid	1.11785	0.778418	0.652361	0.571621		0.251355	0.131373
194	Niacinamide	1.11742	1.08069	1.33172	0.425808		1.57199	0.131556
36	3-Pyridylacetic acid	1.11527	0.774256	0.669376	0.397587		0.286014	0.132478
156	L-Cysteine	1.11204	0.776612	0.652539	0.570851		0.252117	0.133871
244	Suberic acid	1.10857	0.695892	0.648954	0.487224		0.184958	0.135378
91	5-Aminolevulinic acid	1.07105	0.691617	0.706068	0.617546		0.323952	0.152254
55	L-Acetylcarnitine	1.06586	1.03342	1.37832	0.451665		1.65685	0.154677
220	Purine	1.05633	0.692914	0.696173	0.616551		0.306119	0.159179
65	Ascorbic acid	1.03789	1.33628	0.285225	0.239689		0.102839	0.168086
245	Succinic acid	1.03404	0.948665	0.624079	0.274378		0.318203	0.134764
115	Estrone	1.03052	0.616482	0.786661	0.462516		0.475045	0.138448
189	N-Acetyl-L-phenylalanine	1.02729	1.27035	0.358101	0.2785		0.117733	0.152898
182	N-Alpha-acetyllysine	1.02621	1.26527	1.73647	0.340124		2.08879	0.104966
39	4-Aminohippuric acid	1.02431	0.64742	0.719031	0.640903		0.334692	0.17481
130	Guanidine	1.00776	1.25756	0.302817	0.25989		0.0995569	0.179059
253	Theophylline	0.995163	1.6819	0.432031	0.202385		0.342184	0.161527
56	Adenine	0.992385	0.533073	0.84297	0.551936		0.575929	0.191187
254	Thiamine	0.986564	1.36301	2.53553	0.282626		3.09593	0.194257
75	Cholesterol	0.986207	1.63969	0.626816	0.215495		0.561323	0.194446
44	4-Methylcatechol	0.974721	1.1507	0.377263	0.341952		0.124032	0.200583
142	Hypotaurine	0.966865	0.502913	0.820875	0.677111		0.499712	0.204839
199	Octadecanamide	0.958918	1.21168	0.602966	0.268515		0.419799	0.185755
149	Inosine	0.922162	1.03101	1.52109	0.434744		1.83615	0.174662
240	Deoxycholic acid glycine conjugate	0.917793	0.49031	0.802482	0.725544		0.450006	0.232473
230	Retinal	0.8986	1.02881	0.378876	0.345767		0.137914	0.218066
165	L-Leucine	0.886358	0.924773	1.40716	0.481798		1.69091	0.18323
122	Gluconolactone	0.877498	0.832952	1.23501	0.543566		1.42839	0.222864
131	Guanine	0.873001	1.79923	1.44361	0.166287		1.4048	0.259266
267	Uridine	0.866978	0.730956	1.19479	0.597703		1.38879	0.235381
110	Sphingosine	0.853066	0.461789	1.09879	0.71718		1.27872	0.271662
233	Riboflavin	0.847737	1.08192	1.95643	0.322468		2.40049	0.115522
271	Xanthosine	0.812132	0.937808	1.68079	0.438015		2.08096	0.145597
29	3-Methyladenine	0.806772	0.234093	0.932198	0.859504		0.670891	0.301547
81	Cortisol	0.796971	1.13383	0.672119	0.406752		0.558307	0.308066
188	N-Acetyl-L-methionine	0.790705	0.900235	1.58877	0.498692		1.94766	0.276343
76	Cholic acid	0.786907	1.40799	4.77594	0.174901		5.56096	0.152749
204	Oxidized glutathione	0.774223	0.880896	1.63625	0.515622		2.02672	0.200196
99	D-Glyceraldehyde 3-phosphate	0.768617	1.19521	0.532449	0.380356		0.41545	0.327304
161	L-Histidine	0.744918	0.780805	1.30823	0.5505		1.53279	0.343802
168	Norvaline	0.736829	0.776435	1.28386	0.553077		1.48922	0.349519
8	1-Palmitoyl-Palmitoyl	0.701769	0.745838	1.21666	0.56139		1.37284	0.374793
250	Taurocholic Acid	0.649493	1.27068	10.322	0.222395		12.3384	0.202558
154	L-Aspartyl-L-phenylalanine	0.634457	0.743152	1.54898	0.439147		1.87973	0.26725
207	Pantothenol	0.582058	0.673998	1.43773	0.333057		1.7125	0.200481
228	Quinic acid	0.571383	0.087984	0.964386	0.709866		0.644256	0.475451
101	Dihydroxyacetone phosphate	0.559421	1.21852	0.514566	0.370548		0.574263	0.485177
83	Creatinine	0.557041	0.0825348	1.01997	0.921235		0.810212	0.487121
150	Iodotyrosine	0.531019	1.11907	1.57083	0.379994		1.52326	0.508575
51	7b-Hydroxycholesterol	0.522018	0.0880514	1.05655	0.91265		0.515775	0.516076
58	3'-AMP	0.519115	0.190507	0.848634	0.839586		1.03453	0.518506
241	Taurodeoxycholic acid	0.482198	1.05291	3.16714	0.317615		3.43823	0.354851
157	L-Cystine	0.45434	0.987267	0.746739	0.472993		0.774909	0.573764
249	Taurine	0.401296	0.477056	0.83091	0.68761		0.726244	0.552263
218	Prostaglandin E2	0.367747	0.640703	1.20563	0.596269		1.23148	0.650546
217	Progesterone	0.364632	1.11275	0.763159	0.416007		0.86692	0.653363
47	5-Methoxy-Dl-Tryptophan	0.356108	0.287155	0.914909	0.606918		0.801269	0.466471
216	Pregnenolone	0.33948	0.292917	1.10629	0.574823		1.23375	0.494238
15	2-Hydroxypalmitic Acid	0.335812	0.503901	0.931618	0.678087		0.910884	0.616754
57	Adenosine	0.325701	0.180651	1.09513	0.89484		1.31856	0.634841
105	Mannose 6-phosphate	0.318514	0.213684	1.05535	0.87309		1.15503	0.695484
123	Glucose 6-phosphate	0.272504	0.625887	0.768287	0.653073		0.803852	0.738191
71	Bilirubin	0.259105	0.59869	0.723862	0.511248		0.767535	0.514678
74	Carnosine	0.255004	0.980385	1.37263	0.351861		1.16146	0.515089
166	L-Lysine	0.239217	0.301227	0.911062	0.734949		0.862236	0.63539
243	Spermine	0.21624	0.045672	1.02919	0.458135		1.25996	0.283243
139	4-Hydroxyproline	0.215476	0.0403916	1.01664	0.744871		0.836882	0.578386
155	L-Carnitine	0.210183	0.721571	0.891973	0.60336		0.941686	0.79697
88	Cytidine monophosphate	0.183806	0.105923	0.87173	0.915833		1.08336	0.822117
185	N-Acetylglutamine	0.171474	0.701392	1.31844	0.592694		1.1418	0.83392
135	Homocysteine	0.152066	0.842488	1.2977	0.450154		1.08837	0.66793
98	D-Glutamic acid	0.149549	0.642135	1.2385	0.625087		1.10212	0.851805
232	Rhamnose	0.147056	0.0637721	0.97844	0.721116		0.903901	0.595218
171	L-Serine	0.126514	0.426647	0.875659	0.760274		1.06076	0.615793
126	Glycerophosphocholine	0.118217	0.0239565	1.00974	0.985814		1.093	0.885184
33	3-Methylhistidine	0.102709	0.321562	1.12906	0.779244		0.926945	0.54406
37	Ureidopropionic acid	0.0802293	0.785187	1.41523	0.550708		1.06705	0.891226
77	Docosahexaenoic acid	0.0609739	0.0386577	1.01875	0.738855		0.942487	0.618493
215	Pipecolic acid	0.0596657	0.0750494	0.982898	0.719772		0.973342	0.686297
82	Cortisone	0.0595749	0.289797	0.866942	0.750654		1.0504	0.917444
167	L-Malic acid	0.0576193	0.112292	0.980114	0.936207		0.979988	0.920836
127	Glycine	0.0332816	0.662615	1.15827	0.627478		1.01311	0.967604
92	5-Hydroxylysine	0.0317478	0.320899	1.11087	0.813089		0.979688	0.858377
87	Cytidine	0.0172417	0.0820275	0.960449	0.750821		1.01622	0.783272
173	L-Tryptophan	0.00853751	0.110112	1.00529	0.937255		1.24344	0.876202
63	Arachidonic acid	0.00365611	0.137658	1.05373	0.805709		1.00278	0.928524
